# Supplementary figures and images for: The effect of obstetric violence during childbirth on breastfeeding: findings from a perinatal cohort “Birth in Brazil”
Source: PubMed Central journal article supplement — Lancet Reg Health Am. 2023 Feb 16;19:100438. doi: 10.1016/j.lana.2023.100438 (PMC9975306; doi:10.1016/j.lana.2023.100438), 2023-02-16

Vaginal

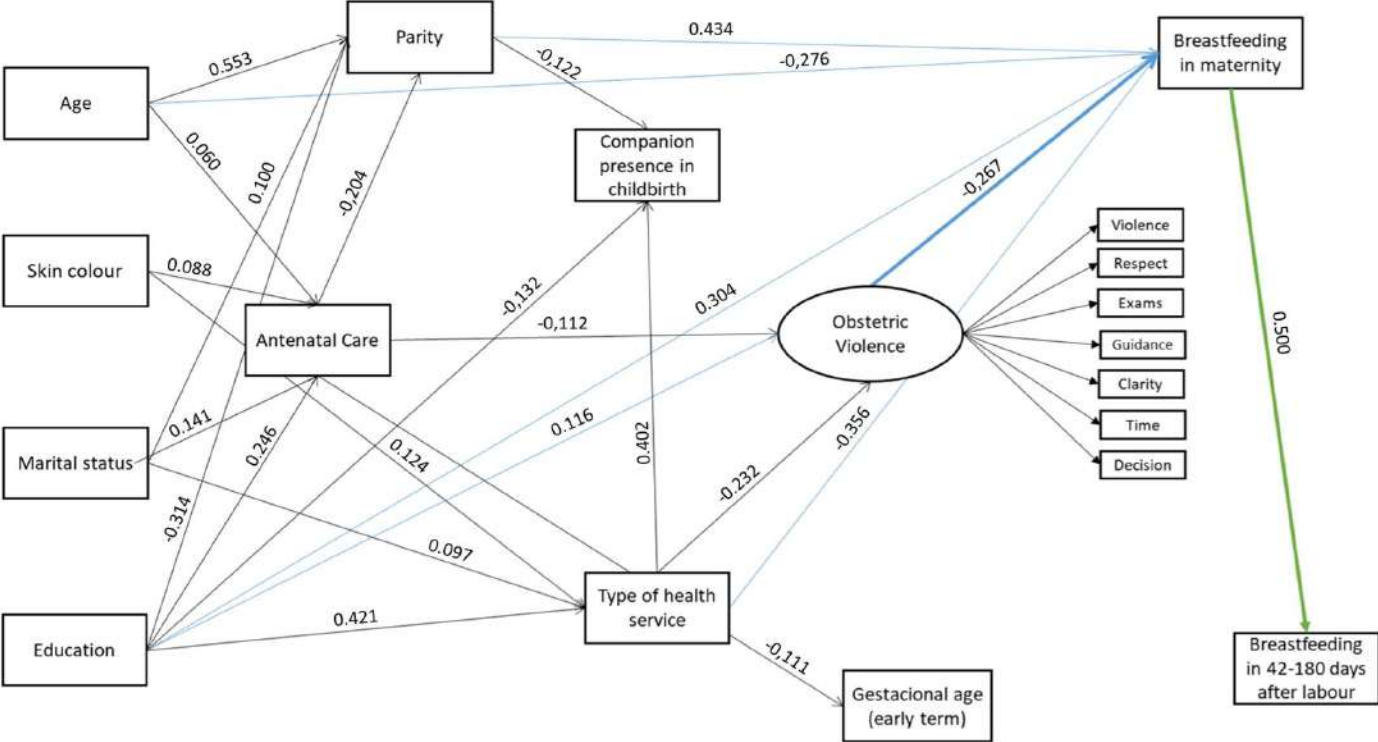

C-section

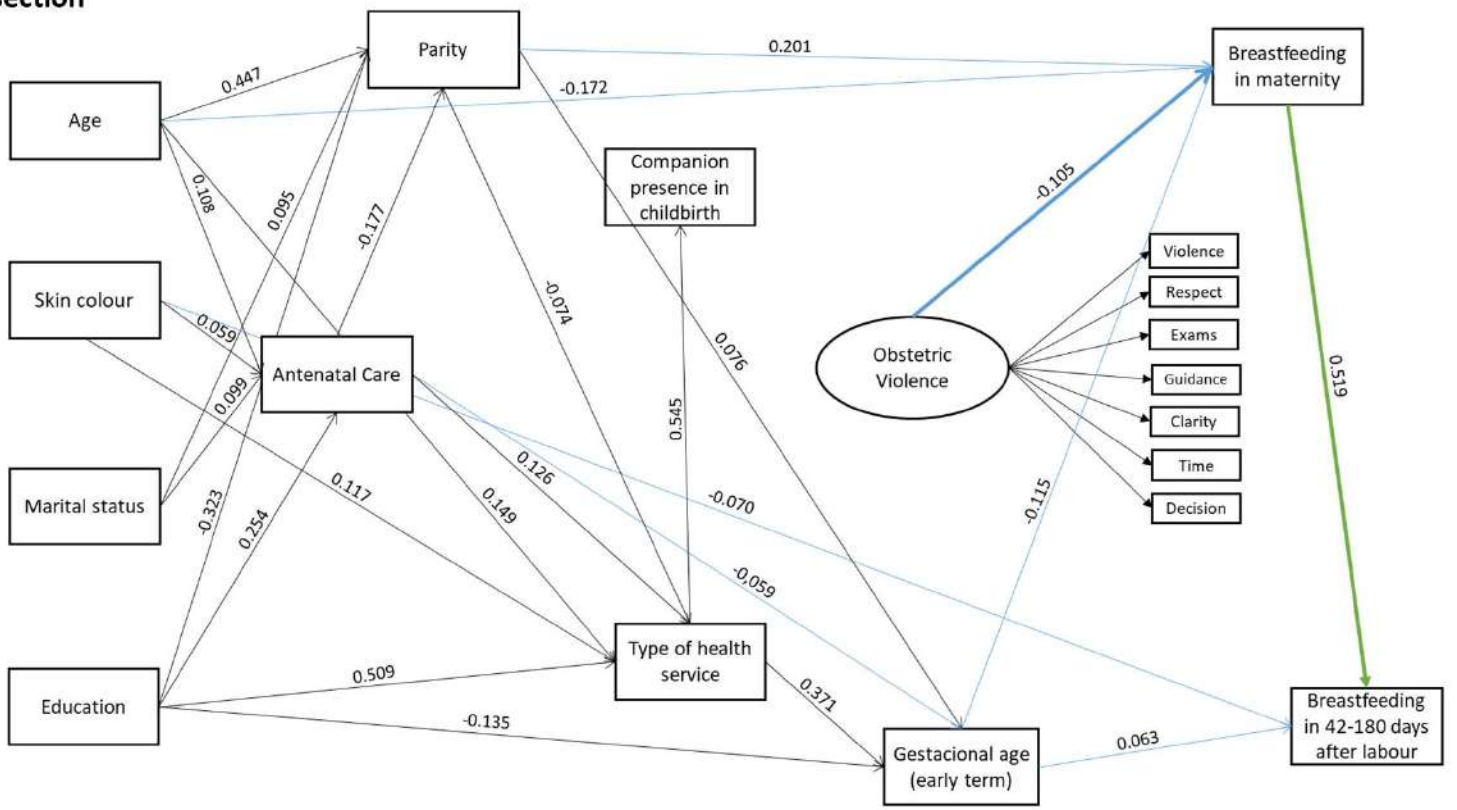

Supplement: mmc1.pdf [file mmc1.pdf]
